# Supplementary material for: Mechanistic Insights into the Effect of Sulfur on the Selectivity of Cobalt-Catalyzed Fischer–Tropsch Synthesis: A DFT Study
Source: MDPI journal article supplement (doi:10.3390/catal12040425), 2022-04-10
Supplement: s1 [file s1]

Supporting information

**Mechanistic insights into effect of sulfur on the selectivity of cobalt catalyzed Fischer-Tropsch Synthesis: A DFT study**

Yagmur Daga and Ali Can Kizilkaya\*

Department of Chemical Engineering, Izmir Institute of Technology,  
35430, Urla, Izmir, Turkey

\*alickankizilkaya@iyte.edu.tr

Table of Contents

1. Top views for the initial states, transition states and final states of the investigated elementary reactions on S-Co(111) for 0.25 ML sulfur coverage
2. Top and side views of S-Co(111) for 0.25 ML sulfur coverage
3. Comparison of the calculated adsorption energies ( $E_{ad}$ ) and activation barriers ( $E_a$ ) on Co(111) with literature
4.  $E_{ad}$  values for adsorbates for 0.25 ML, 0.11 ML and 0.06 ML coverages on Co(111) vs S-Co(111)

1. Top views for the initial states, transition states and final states of the investigated elementary reactions on S-Co(111) for 0.25 ML sulfur coverage

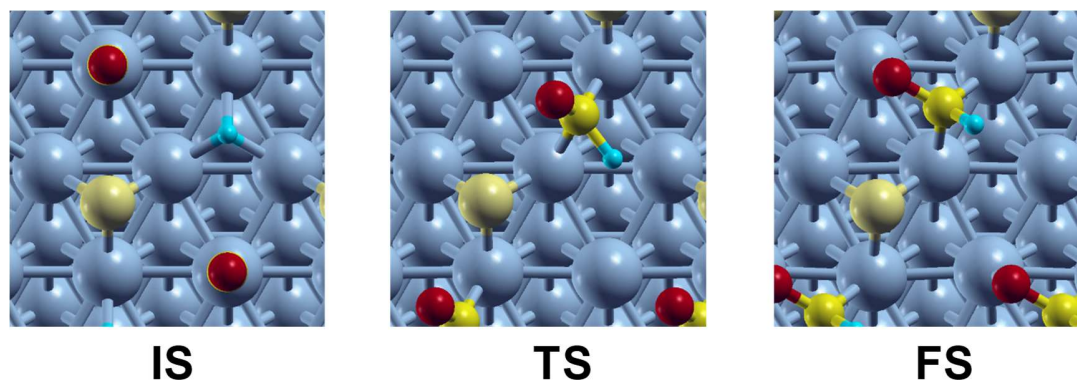

Figure S1. Initial state (IS), transition state (TS) and final state (FS) for HCO formation ( $\text{H} + \text{CO} \rightarrow \text{HCO}$ ) on S-Co(111) (Color coding: Sulfur: Pale yellow, C: Bright yellow, O: Red, H: Blue, Co: Grey).

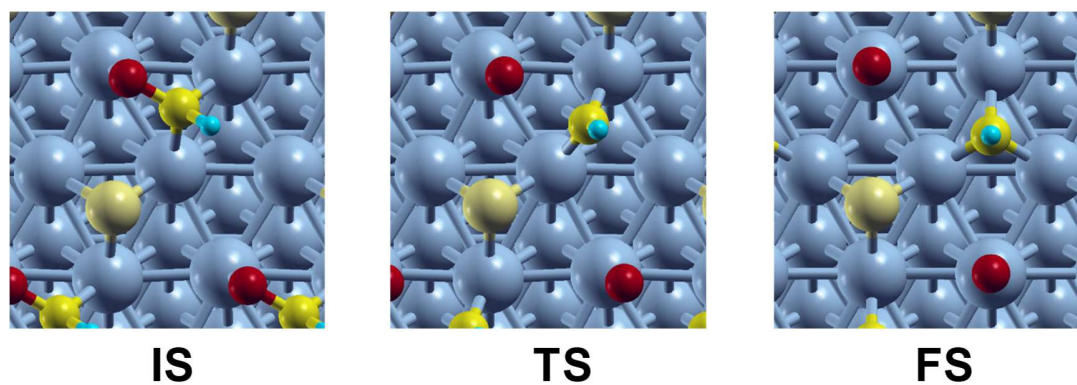

Figure S2. Initial state (IS), transition state (TS) and final state (FS) for HCO dissociation ( $\text{HCO} \rightarrow \text{HC} + \text{O}$ ) on S-Co(111).

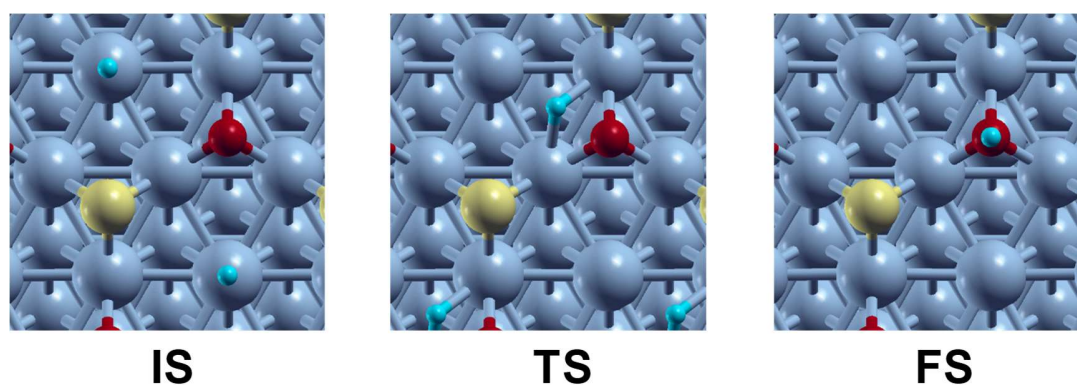

Figure S3. Initial state (IS), transition state (TS) and final state (FS) for OH formation ( $\text{O} + \text{H} \rightarrow \text{OH}^*$ ) on S-Co(111).

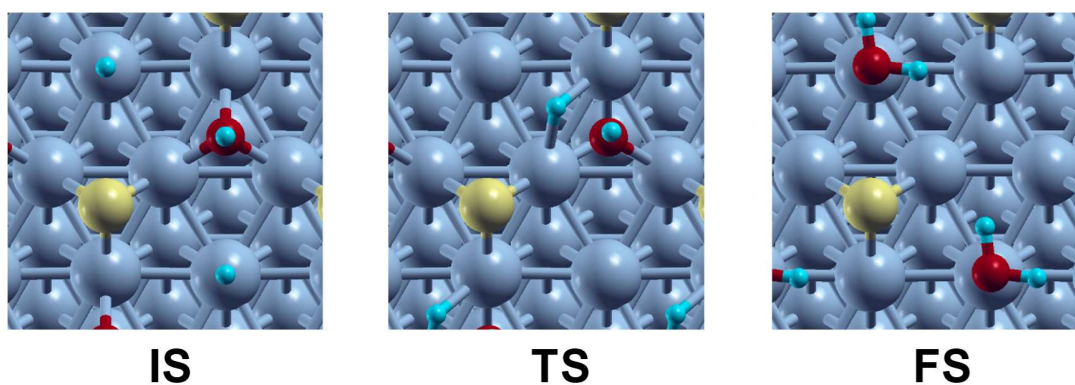

Figure S4. Initial state (IS), transition state (TS) and final state (FS) for OH hydrogenation ( $\text{OH} + \text{H} \rightarrow \text{H}_2\text{O} + ^*$ ) on S-Co(111).

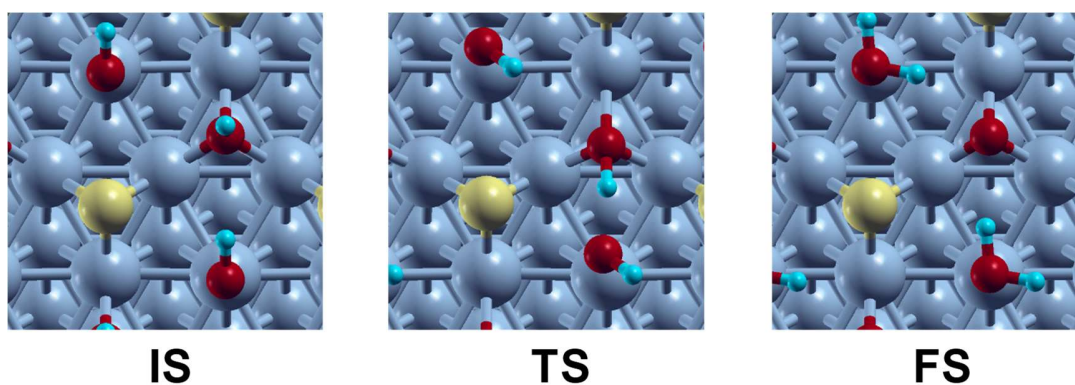

Figure S5. Initial state (IS), transition state (TS) and final state (FS) for OH coupling ( $\text{OH} + \text{OH} \rightarrow \text{H}_2\text{O} + \text{O}$ ) on S-Co(111).

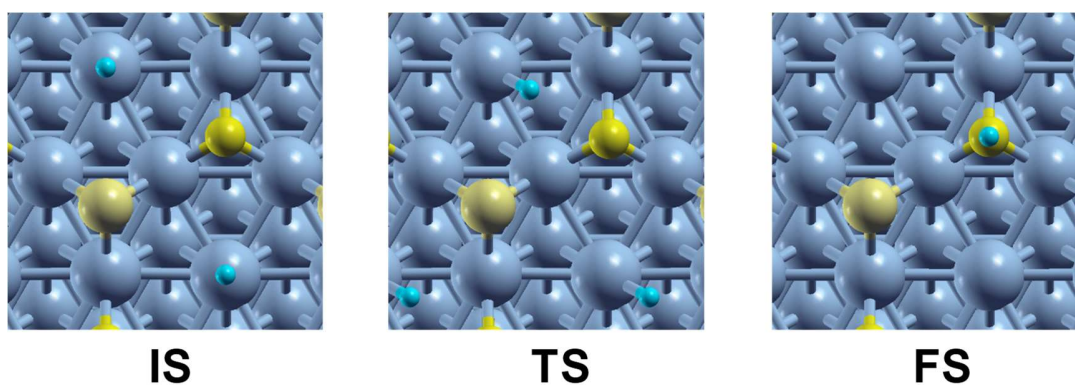

Figure S6. Initial state (IS), transition state (TS) and final state (FS) for CH formation ( $\text{C} + \text{H} \rightarrow \text{CH} + ^*$ ) on S-Co(111).



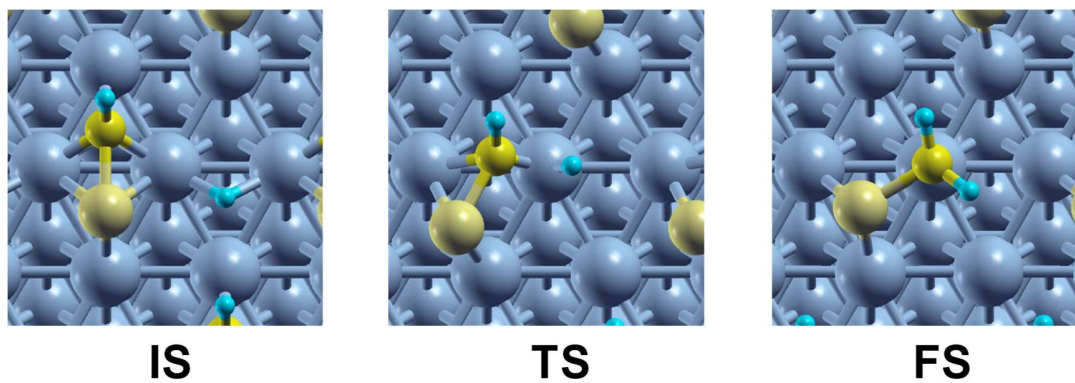

Figure S7. Initial state (IS), transition state (TS) and final state (FS) for  $\text{CH}_2$  formation ( $\text{CH}+\text{H}\rightarrow\text{CH}_2^+$ ) on S-Co(111).

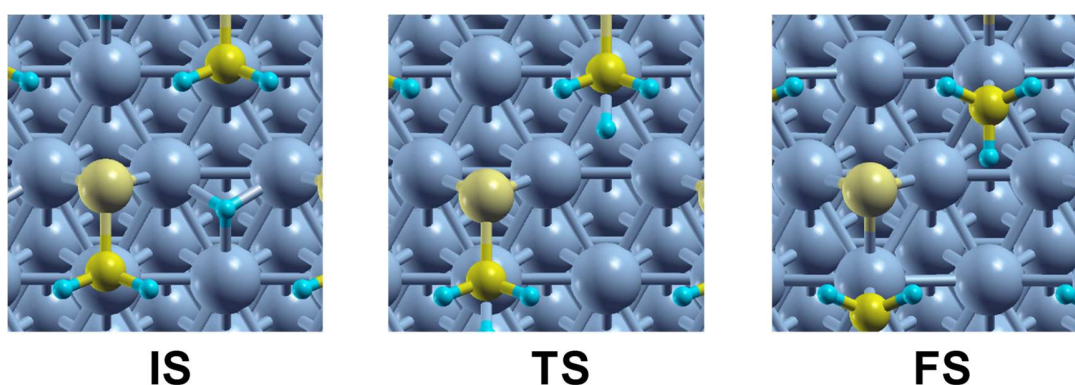

Figure S8. Initial state (IS), transition state (TS) and final state (FS) for  $\text{CH}_3$  formation ( $\text{CH}_2+\text{H}\rightarrow\text{CH}_3^+$ ) on S-Co(111).

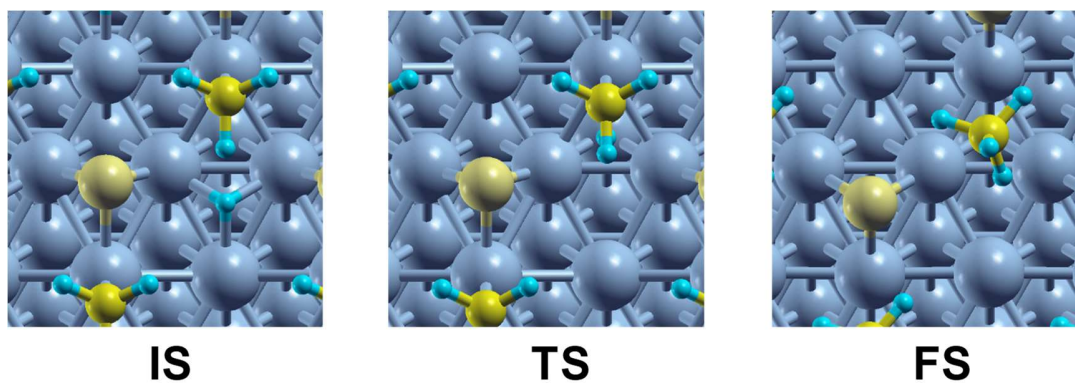

Figure S9. Initial state (IS), transition state (TS) and final state (FS) for  $\text{CH}_4$  formation ( $\text{CH}_3+\text{H}\rightarrow\text{CH}_4^+$ ) on S-Co(111).

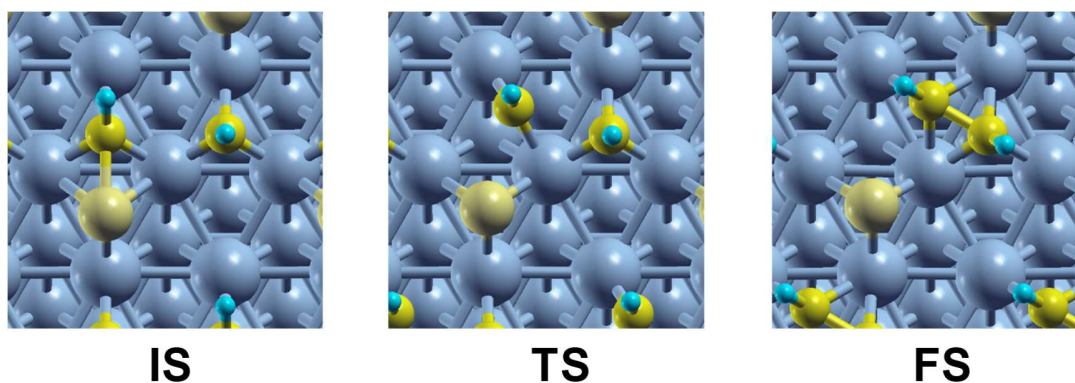

Figure S10. Initial state (IS), transition state (TS) and final state (FS) for  $C_2H_2$  formation ( $CH+CH \rightarrow C_2H_2^+$ ) on S-Co(111).

## 2. Top and side views of S-Co(111) for 0.25 ML sulfur coverage

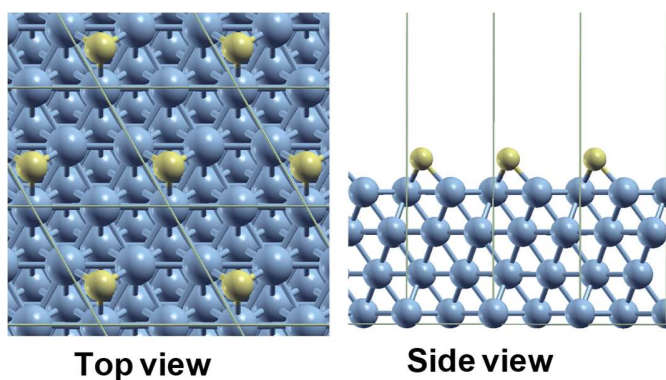

Figure S11. Top and side views of S-Co(111) for 0.25 ML sulfur coverage.

## 3. Comparison of the calculated adsorption energies ( $E_{ad}$ ) and activation barriers ( $E_a$ ) with literature

Table S1. Comparison of the calculated  $E_{ad}$  with literature

|            | Our study | Our study | Literature        | Literature        |
|------------|-----------|-----------|-------------------|-------------------|
| Adsorbates | 0.25 ML   | 0.06 ML   | 0.25 ML           | 0.04 ML           |
| CO         | -140      | -134      | -176 <sup>b</sup> | -174 <sup>a</sup> |
| H          | -288      | -283      | -284 <sup>b</sup> | -269 <sup>a</sup> |
| C          | -647      | -640      | -695 <sup>b</sup> | -680 <sup>a</sup> |
| CH         | -635      | -619      | -642 <sup>b</sup> | -624 <sup>a</sup> |
| $C_2H_2$   | -206      | -209      | NA                | -257 <sup>a</sup> |
| O          | -545      | -542      | -542 <sup>c</sup> | -586 <sup>a</sup> |
| OH         | -385      | -397      | -345 <sup>c</sup> | -361 <sup>a</sup> |

a. PBE functional, Co(111)[25] , b. PBE functional, Co(111)[33] , c. PBE functional, Co(0001)[34] .

Table S2. Comparison of the calculated activation barriers ( $E_a$ ) with literature

|                            | Our study | Literature       | Literature       |
|----------------------------|-----------|------------------|------------------|
|                            | 0.25 ML   | 0.04 ML          | 0.25 ML          |
| $H+CO \rightarrow HCO$     | 121       | 130 <sup>a</sup> | 146 <sup>b</sup> |
| $HCO \rightarrow HC+O$     | 74        | 63 <sup>a</sup>  | 90 <sup>b</sup>  |
| $C+H \rightarrow CH$       | 77        | 69 <sup>a</sup>  | 77 <sup>c</sup>  |
| $CH+H \rightarrow CH_2$    | 65        | 58 <sup>a</sup>  | 66 <sup>c</sup>  |
| $CH_2+H \rightarrow CH_3$  | 49        | 56 <sup>a</sup>  | 47 <sup>c</sup>  |
| $CH_3+H \rightarrow CH_4$  | 93        | 95 <sup>a</sup>  | 82 <sup>c</sup>  |
| $CH+CH \rightarrow C_2H_2$ | 67        | 62 <sup>a</sup>  | NA               |
| $O+H \rightarrow OH$       | 122       | 48 <sup>a</sup>  | 116 <sup>d</sup> |
| $O+H \rightarrow H_2O$     | 142       | 151 <sup>a</sup> | 111 <sup>d</sup> |
| $OH+OH \rightarrow H_2O+O$ | 5         | 47 <sup>a</sup>  | 5 <sup>d</sup>   |

a. PBE functional, Co(111)[25] , b. PBE functional, Co(0001)[37], c. PBE functional, Co(111)[33] , d. rPBE functional, Co(111)[40] .

4.  $E_{ad}$  values for adsorbates for 0.25 ML, 0.11 ML and 0.06 ML adsorbate/sulfur coverages on Co(111)/S-Co(111)

Table S3.  $E_{ad}$  values for adsorbates for 0.25 ML, 0.11 ML and 0.06 ML adsorbate/sulfur coverages on Co(111)/S-Co(111)

|            | Co(111) | S-Co(111) | Co(111) | S-Co(111)      |                | Co(111) | S-Co(111)      |                |
|------------|---------|-----------|---------|----------------|----------------|---------|----------------|----------------|
| Adsorbates | 0.25ML  | 0.25ML    | 0.11 ML | 0.11ML (Zone1) | 0.11ML (Zone2) | 0.06 ML | 0.06ML (Zone1) | 0.06ML (Zone2) |
| CO         | -140    | -70       | -129    | -117           | -127           | -134    | -121           | -132           |
| H          | -288    | -262      | -278    | -266           | -283           | -283    | -269           | -283           |
| C          | -647    | -562      | -632    | -597           | -624           | -640    | -611           | -637           |
| CH         | -635    | -600      | -615    | -592           | -615           | -619    | -592           | -619           |
| $C_2H_2$   | -206    | -6        | -201    | -163           | -197           | -209    | -189           | -207           |
| O          | -545    | -451      | -535    | -494           | -527           | -542    | -494           | -536           |
| OH         | -385    | -288      | -391    | -361           | -390           | -397    | -363           | -393           |
| S          | -491    | NA        | -481    | NA             | NA             | -487    | NA             | NA             |
